# Supplementary material for: Teriflunomide Inhibits JCPyV Infection and Spread in Glial Cells and Choroid Plexus Epithelial Cells
Source: MDPI journal article supplement (doi:10.3390/ijms22189809), 2021-09-10
Supplement: s1 [file s1]

*Supplementary Material*

**Table S1.** Patient samples were analyzed by ddPCR for the presence of JCPyV DNA in both EV and total sample. Results are stratified by matched patients and unmatched patients. The absolute copy number for all JCPyV-positive patients is reported as detected genome copies/mL. Samples that were below the threshold or that did not have consensus between probes are reported as JCPyV negative (NEG). N/A indicates the sample was not available for analysis. NIM = nonimmunomodulated.

| Diagnosis               | Treatment     | Sample ID    | Type  | Target | CSF | Plasma | Serum |
|-------------------------|---------------|--------------|-------|--------|-----|--------|-------|
| <b>Matched patients</b> |               |              |       |        |     |        |       |
| RRMS                    | Teriflunomide | 537695/96/97 | Total | T-ag   | NEG | 397    | NEG   |
|                         |               |              |       | VP1    | NEG | 126    | NEG   |
|                         |               |              | EV    | T-ag   | NEG | NEG    | NEG   |
|                         |               |              |       | VP1    | NEG | NEG    | NEG   |
| RRMS                    | Teriflunomide | 603099/00/01 | Total | T-ag   | NEG | 200    | NEG   |
|                         |               |              |       | VP1    | NEG | 146    | NEG   |
|                         |               |              | EV    | T-ag   | NEG | NEG    | NEG   |
|                         |               |              |       | VP1    | NEG | NEG    | NEG   |
| RRMS                    | NIM           | 613029/30/31 | Total | T-ag   | NEG | 263    | 250   |
|                         |               |              |       | VP1    | NEG | 290    | 280   |
|                         |               |              | EV    | T-ag   | NEG | NEG    | 120   |
|                         |               |              |       | VP1    | NEG | NEG    | 725   |
| RRMS                    | NIM           | 631005/06/07 | Total | T-ag   | NEG | NEG    | 320   |
|                         |               |              |       | VP1    | NEG | NEG    | 340   |
|                         |               |              | EV    | T-ag   | NEG | 275    | 5500  |
|                         |               |              |       | VP1    | NEG | 1000   | 4830  |
| RRMS                    | Teriflunomide | 514866/68    | Total | T-ag   | NEG | N/A    | NEG   |

| Diagnosis | Treatment     | Sample ID | Type  | Target | CSF | Plasma | Serum |
|-----------|---------------|-----------|-------|--------|-----|--------|-------|
|           |               |           |       | VP1    | NEG | N/A    | NEG   |
|           |               |           | EV    | T-ag   | 145 | N/A    | 415   |
|           |               |           |       | VP1    | 305 | N/A    | 120   |
| RRMS      | Teriflunomide | 505961/63 | Total | T-ag   | NEG | N/A    | 120   |
|           |               |           |       | VP1    | NEG | N/A    | 140   |
|           |               |           | EV    | T-ag   | NEG | N/A    | 185   |
|           |               |           |       | VP1    | NEG | N/A    | 675   |
| RRMS      | Teriflunomide | 506459/91 | Total | T-ag   | NEG | N/A    | NEG   |
|           |               |           |       | VP1    | NEG | N/A    | NEG   |
|           |               |           | EV    | T-ag   | NEG | N/A    | NEG   |
|           |               |           |       | VP1    | NEG | N/A    | NEG   |
| RRMS      | Teriflunomide | 50746/58  | Total | T-ag   | NEG | N/A    | NEG   |
|           |               |           |       | VP1    | NEG | N/A    | NEG   |
|           |               |           | EV    | T-ag   | NEG | N/A    | NEG   |
|           |               |           |       | VP1    | NEG | N/A    | NEG   |
| RRMS      | Natalizumab   | 616760/62 | Total | T-ag   | N/A | 333    | NEG   |
|           |               |           |       | VP1    | N/A | 273    | NEG   |
|           |               |           | EV    | T-ag   | N/A | 240    | 120   |
|           |               |           |       | VP1    | N/A | 345    | 345   |
| RRMS      | Natalizumab   | 613050/52 | Total | T-ag   | N/A | 423    | NEG   |
|           |               |           |       | VP1    | N/A | 243    | NEG   |

| Diagnosis          | Treatment     | Sample ID | Type  | Target | CSF  | Plasma | Serum |
|--------------------|---------------|-----------|-------|--------|------|--------|-------|
|                    |               |           | EV    | T-ag   | N/A  | 120    | NEG   |
|                    |               |           |       | VP1    | N/A  | 675    | NEG   |
| PML                | Unknown       | 1015193   | Total | T-ag   | 4900 | 4500   | N/A   |
|                    |               |           |       | VP1    | 5000 | 4300   | N/A   |
|                    |               |           | EV    | T-ag   | 640  | 300    | N/A   |
|                    |               |           |       | VP1    | 670  | 243    | N/A   |
| PML                | Unknown       | 1518105   | Total | T-ag   | 8600 | 380    | N/A   |
|                    |               |           |       | VP1    | 8500 | 810    | N/A   |
|                    |               |           | EV    | T-ag   | 273  | 223    | N/A   |
|                    |               |           |       | VP1    | 500  | 300    | N/A   |
| Unmatched patients |               |           |       |        |      |        |       |
| RRMS               | Teriflunomide | 510050    | Total | T-ag   | NEG  | N/A    | N/A   |
|                    |               |           |       | VP1    | NEG  | N/A    | N/A   |
|                    |               |           | EV    | T-ag   | NEG  | N/A    | N/A   |
|                    |               |           |       | VP1    | NEG  | N/A    | N/A   |
| RRMS               | Natalizumab   | 227994    | Total | T-ag   | N/A  | 400    | N/A   |
|                    |               |           |       | VP1    | N/A  | 166    | N/A   |
|                    |               |           | EV    | T-ag   | N/A  | NEG    | N/A   |
|                    |               |           |       | VP1    | N/A  | NEG    | N/A   |
| RRMS               | Natalizumab   | 304340    | Total | T-ag   | N/A  | NEG    | N/A   |
|                    |               |           |       | VP1    | N/A  | NEG    | N/A   |

| Diagnosis | Treatment   | Sample ID | Type  | Target | CSF | Plasma | Serum |
|-----------|-------------|-----------|-------|--------|-----|--------|-------|
|           |             |           | EV    | T-ag   | N/A | 385    | N/A   |
|           |             |           |       | VP1    | N/A | 575    | N/A   |
| RRMS      | Natalizumab | 611700    | Total | T-ag   | N/A | NEG    | N/A   |
|           |             |           |       | VP1    | N/A | NEG    | N/A   |
|           |             |           | EV    | T-ag   | N/A | NEG    | N/A   |
|           |             |           |       | VP1    | N/A | NEG    | N/A   |
| RRMS      | Natalizumab | 211670    | Total | T-ag   | N/A | 200    | N/A   |
|           |             |           |       | VP1    | N/A | 207    | N/A   |
|           |             |           | EV    | T-ag   | N/A | 350    | N/A   |
|           |             |           |       | VP1    | N/A | 830    | N/A   |
|           |             |           |       |        |     |        |       |
| RRMS      | Natalizumab | 216647    | Total | T-ag   | N/A | 370    | N/A   |
|           |             |           |       | VP1    | N/A | 620    | N/A   |
|           |             |           | EV    | T-ag   | N/A | 1100   | N/A   |
|           |             |           |       | VP1    | N/A | 207    | N/A   |
| RRMS      | Natalizumab | 578000    | Total | T-ag   | N/A | N/A    | NEG   |
|           |             |           |       | VP1    | N/A | N/A    | NEG   |
|           |             |           | EV    | T-ag   | N/A | N/A    | NEG   |
|           |             |           |       | VP1    | N/A | N/A    | NEG   |
| RRMS      | Natalizumab | 614111    | Total | T-ag   | N/A | N/A    | NEG   |
|           |             |           |       | VP1    | N/A | N/A    | NEG   |

| Diagnosis | Treatment   | Sample ID | Type  | Target | CSF | Plasma | Serum |
|-----------|-------------|-----------|-------|--------|-----|--------|-------|
|           |             |           | EV    | T-ag   | N/A | N/A    | NEG   |
|           |             |           |       | VP1    | N/A | N/A    | NEG   |
| RRMS      | Natalizumab | 458688    | Total | T-ag   | N/A | N/A    | NEG   |
|           |             |           |       | VP1    | N/A | N/A    | NEG   |
|           |             |           | EV    | T-ag   | N/A | N/A    | NEG   |
|           |             |           |       | VP1    | N/A | N/A    | NEG   |
| RRMS      | Natalizumab | 644018    | Total | T-ag   | N/A | N/A    | NEG   |
|           |             |           |       | VP1    | N/A | N/A    | NEG   |
|           |             |           | EV    | T-ag   | N/A | N/A    | NEG   |
|           |             |           |       | VP1    | N/A | N/A    | NEG   |
| RRMS      | Natalizumab | 607678    | Total | T-ag   | N/A | N/A    | NEG   |
|           |             |           |       | VP1    | N/A | N/A    | NEG   |
|           |             |           | EV    | T-ag   | N/A | N/A    | NEG   |
|           |             |           |       | VP1    | N/A | N/A    | NEG   |
